# Supplementary material for: Synthesis of Bi2WO6−xnanodots with oxygen vacancies as an all-in-one nanoagent for simultaneous CT/IR imaging and photothermal/photodynamic therapy of tumors
Source: Royal Society of Chemistry journal article supplement (doi:10.1039/c9nr05236d), 2019-01-01
Supplement: c9nr05236d1.pdf [file c9nr05236d1.pdf]

1 **Supporting information for**

2 **Synthesis of  $\text{Bi}_2\text{WO}_{6-x}$  nanodots with oxygen vacancies as all-in-one nanoagent for**  
3 **simultaneous CT/IR imaging and photothermal/photodynamic therapy of tumors**

4 Shun Wang,<sup>a,b</sup> Han Wang,<sup>c</sup> Cen Song,<sup>b</sup> Zhicong Li,<sup>c</sup> Zhaojie Wang,<sup>b</sup> Hao Xu,<sup>b</sup> Wanjian Yu,<sup>b</sup>  
5 Chen Peng,<sup>a</sup> Maoquan Li,<sup>a</sup> Zhigang Chen<sup>a,b\*</sup>

6

7 **1 Experimental section**

8 **1.1 Materials**

9 Bismuth nitrate pentahydrate ( $\text{Bi}(\text{NO}_3)_3 \cdot 5\text{H}_2\text{O}$ ), sodium tungstate dehydrate  
10 ( $\text{Na}_2\text{WO}_4 \cdot 2\text{H}_2\text{O}$ ), citric acid monohydrate (CA), hexadecyl trimethyl ammonium bromide  
11 (CTAB), 1,3-diphenyl isobenzofuran (DPBF) were purchased from Sinopharm Chemical  
12 Reagent Co., Ltd (China). Acetone and ammonia solution ( $\text{NH}_3 \cdot \text{H}_2\text{O}$ ) were obtained from  
13 Shanghai Lingfeng Chemical Reagent Co., Ltd. Calcein-AM, propidium iodide (PI), 2',7'-  
14 Dichlorofluorescein diacetate (DCFH-DA), 4',6-Diamidino-2-phenylindole dihydrochloride  
15 (DAPI), cell counting kit-8 (Cck-8) and phosphate buffer saline (PBS) were purchased from  
16 Beyotime Biotechnology Co., Ltd.

17 **2.2 Characterization**

18 Both black  $\text{Bi}_2\text{WO}_{6-x}$  and faint-yellow  $\text{Bi}_2\text{WO}_6$  samples were analyzed by using high-

---

<sup>a</sup>Department of Interventional and Vascular Surgery, Shanghai Tenth People's Hospital, Tongji University School of Medicine, Shanghai 200072, China.

<sup>b</sup>College of Materials Science and Engineering, Donghua University, Shanghai 201620, China. \*E-mail: zgchen@dhu.edu.cn

<sup>c</sup>Department of Radiology, Shanghai General Hospital, School of Medicine, Shanghai Jiaotong University, Shanghai 200080, China.

19 resolution transmission electron microscopy (HR-TEM, FEI Talos F200S) equipped with  
20 energy dispersive spectroscopy (EDS), powder X-Ray diffractometer (XRD, Bruker D4),  
21 electron paramagnetic resonance spectroscopy (EPR, Bruker EMX-10/12) at 110 K, X-ray  
22 photoelectron spectroscopy (XPS, Escalab 250Xi), UV-vis-NIR absorption spectrophotometer  
23 (Shimadzu UV-3600). The Fourier transform infrared (FT-IR) spectrum was obtained from  
24 FT-IR spectrometer (Nicolet 8700). The concentration of  $\text{Bi}_2\text{WO}_{6-x}$  dispersion was measured  
25 by high dispersion inductively coupled plasma atomic emission spectroscopy (ICP-AES,  
26 Prodigy, USA). The diameter of nanodots in dispersion was acquired by using Particle Size &  
27 Zeta Potential Analyzer (nano ZS).

### 28 **1.3 Cell experiments**

29 **Cytotoxicity test of  $\text{Bi}_2\text{WO}_{6-x}$ .** The viability of 4T1 cell was used to evaluate the  
30 cytotoxicity of  $\text{Bi}_2\text{WO}_{6-x}\text{-CA}_{1.0}$  nanodots by using standard CCK-8 assay. The 4T1 cells  
31 which density is  $10^4$  cells per well were seeded into 96-well culture plate. Subsequently, the  
32 4T1 cells were incubated at standard situation ( $37\text{ }^\circ\text{C}$ ,  $5\%$   $\text{CO}_2$ ) in a humidified incubator for  
33 6 h. Then  $\text{Bi}_2\text{WO}_{6-x}\text{-CA}_{1.0}$  dispersions were injected into the 96-well culture plate at different  
34 Bi concentrations ( $0.34\text{-}0\text{ g L}^{-1}$ ). After incubated 24 h and/or 48 h,  $10\text{ }\mu\text{L}$  of cck-8 mixed with  
35  $100\text{ }\mu\text{L}$  of culture medium were added to each 96 wells. Then the cell viability was calculated  
36 by the absorbance at 450 and 650 nm of assay. All experiments were repeated 5 times  
37 independently.

38 **Intercellular singlet oxygen detection.**  $350\text{ }\mu\text{L}$  of 1640 culture medium containing 4T1  
39 cells were seeded to 24-well culture plate at a density of  $10^4$  cell/well. After incubated 24 h,

40 the medium was replaced by 200  $\mu\text{L}$  of 1640 culture medium containing Saline and  $\text{Bi}_2\text{WO}_6$ -  
41  $\text{-CA}_{1.0}$  dispersion. The 1640 cells were divided into four groups: (a) Saline; (b) Saline + laser;  
42 (c)  $\text{Bi}_2\text{WO}_{6-x}\text{-CA}_{1.0}$ ; (d)  $\text{Bi}_2\text{WO}_{6-x}\text{-CA}_{1.0}$  + laser. Then the cells were stained with ROS-  
43 sensitive probe (2',7'-Dichlorofluorescein diacetate, DCFH-DA), irradiated by 808 nm laser  
44 ( $1.0 \text{ W cm}^{-2}$ ) for 10 min and incubated for 30 min. Subsequently, the cells were washed with  
45 the fresh 1640 culture medium without serum three times and stained with DPAI. Finally, the  
46 prepared 1640 cells were imaged by CFM to detect singlet oxygen ( $^1\text{O}_2$ ).

47 **Photothermal/photodynamic therapy in vitro.** 350  $\mu\text{L}$  of 1640 culture medium  
48 containing 4T1 cells were seeded to 24-well culture plate at a density of  $10^4$  cell/well. After  
49 incubated 24 h, the medium was replaced by 200  $\mu\text{L}$  of 1640 culture medium containing Saline  
50 and  $\text{Bi}_2\text{WO}_{6-x}$  dispersion. The cells were divided into four groups according to the different  
51 medium containing materials with/without irradiation: (a) Saline; (b) Saline + laser; (c)  
52  $\text{Bi}_2\text{WO}_{6-x}\text{-CA}_{1.0}$ ; (d)  $\text{Bi}_2\text{WO}_{6-x}\text{-CA}_{1.0}$  + laser. Then the cells of group (b) & (d) were irradiated  
53 by 808 nm laser at an output power density of  $1.0 \text{ W cm}^{-2}$  for 10 min. Subsequently, the cells  
54 were washed with PBS and incubated for 30 min after stained with Calcein-AM and  
55 propidium iodide (PI). Then the 4T1 cells were imaged by a confocal fluorescence  
56 microscope (CFM, Leica TCS SP8, Leica Microsystems).

#### 57 **1.4 Animal experiments**

58 **Animals and tumor model.** All animal procedures were performed in accordance with  
59 the Guidelines for Care and Use of Laboratory Animals of the U.S. National Institutes of  
60 Health (NIH Publication no. 86-23, revised 1985) and approved by the Animal Ethics

61 Committee of Donghua University. BALB/c nude mice (15-20 g, male) were purchased from  
62 Shanghai Laboratory Animal Center (SLAC, Shanghai, China). 4T1 cells ( $3.0 \times 10^6$  per  
63 mouse) were injected subcutaneously into the backside of each mouse to prepare tumor-  
64 bearing mice.

65 **CT imaging in vivo.** X-ray attenuation coefficient of  $\text{Bi}_2\text{WO}_{6-x}\text{-CA}_{1.0}$  nanodot  
66 dispersions and commercial Iobitridol solutions with various concentrations were studied with  
67 a GE LightSpeed VCT imaging system with 120 kV. When the diameter of tumors reached at  
68 6 mm, the mice were hocused by pentobarbital ( $10 \text{ mg kg}^{-1}$ ) through intraperitoneal injection  
69 method. Then the mice were intratumorally injected different volume of PBS (0 and 100  $\mu\text{L}$ )  
70 containing  $\text{Bi}_2\text{WO}_{6-x}$  nanodots ( $0.17 \text{ g L}^{-1}$ ) and Iopromide solutions. CT imaging of mice were  
71 measured before and after the injection of  $\text{Bi}_2\text{WO}_{6-x}$  nanodots dispersion for 30 min.

72 **Photothermal/photodynamic therapy in vivo.** 4T1 tumor-bearing mice were assigned  
73 to four groups randomly: (I) Saline injection, (II) Saline injection + Laser, (III)  $\text{Bi}_2\text{WO}_{6-x}\text{-}$   
74  $\text{CA}_{1.0}$  injection, and (IV)  $\text{Bi}_2\text{WO}_{6-x}\text{-CA}_{1.0}$  injection + Laser. Then mice of each group were  
75 intratumorally injected with saline (100  $\mu\text{L}$ ) and saline solution containing  $\text{Bi}_2\text{WO}_{6-x}$  nanodots  
76 (100  $\mu\text{L}$ ,  $0.17 \text{ g L}^{-1}$ ). After 1 h, the tumor of mice in group (b,d) were irradiated by 808 nm  
77 laser ( $1.0 \text{ W cm}^{-2}$ ) for 10 min. The infrared thermal imaging was real-time recorded by IR-  
78 thermal imaging camera.

79 **Histology analysis.** After mouse sacrificed, major organs and tumors were obtained. The  
80 concentration of Bi ions in main organs were measured by Inductively coupled plasma mass  
81 spectrometry (ICP-MS); Finally, major organs were sectioned into slices, stained using by

82 hematoxylin and eosin (H&E) staining, and then and observed by a digital microscope.

83 **2 Figures**

84

85

86

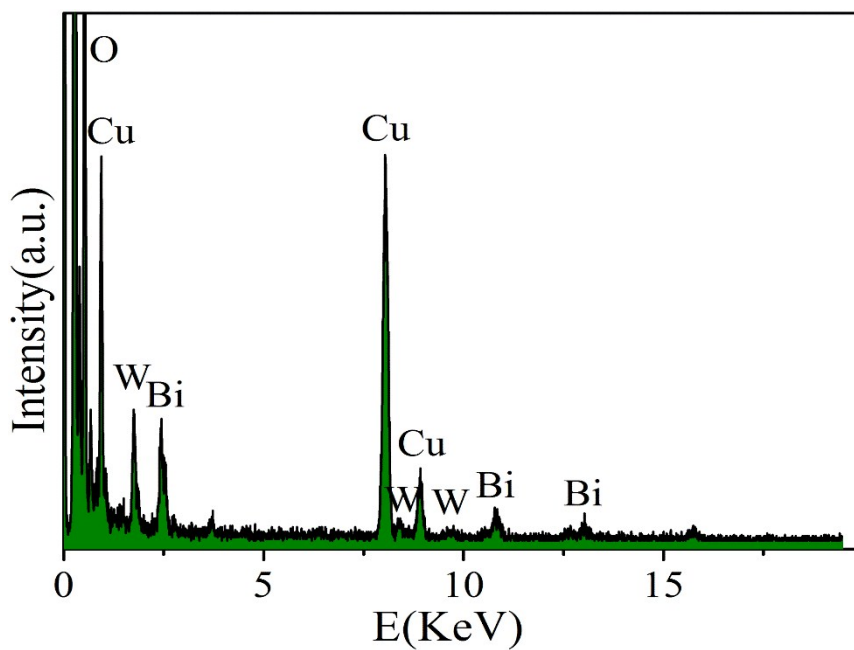

87

88

89

Fig.S1 EDS pattern of  $\text{Bi}_2\text{WO}_{6-x}\text{-CA}_{1.0}$  sample.

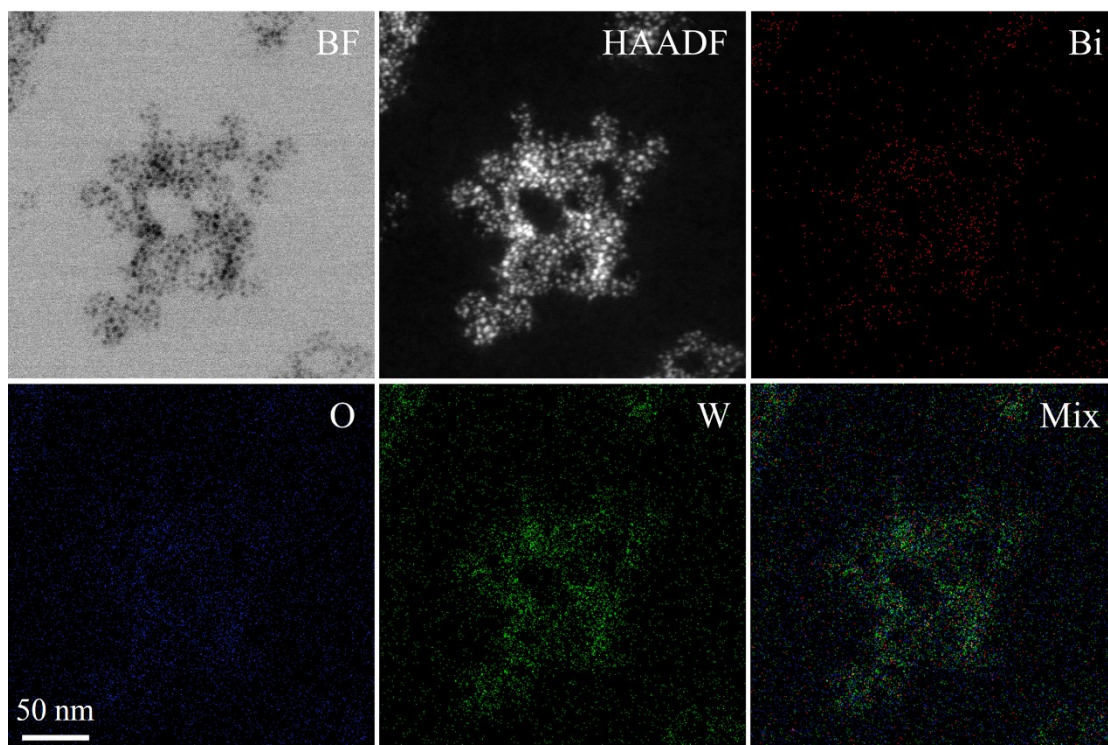

90

91  
92  
93

**Fig.S2** Mapping images of  $\text{Bi}_2\text{WO}_{6-x}\text{-CA}_{1.0}$  sample.

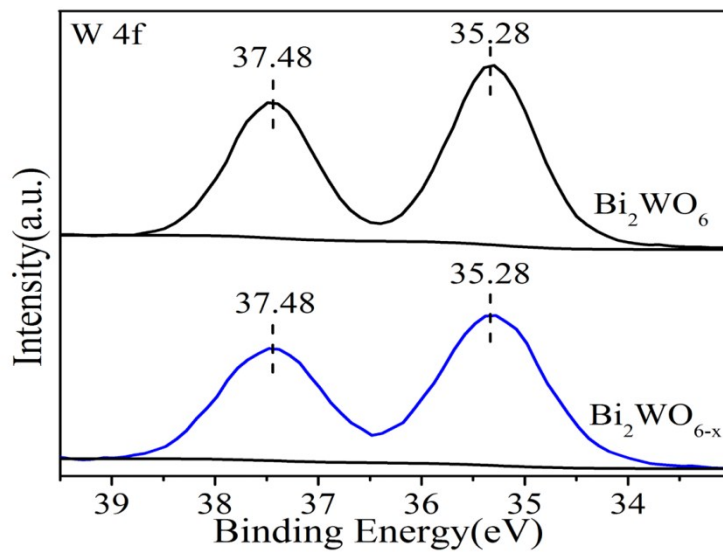

94  
95  
96  
97

**Fig. S3** W4f spectrum of both  $\text{Bi}_2\text{WO}_{6-x}$  and  $\text{Bi}_2\text{WO}_6$  nanodot samples.

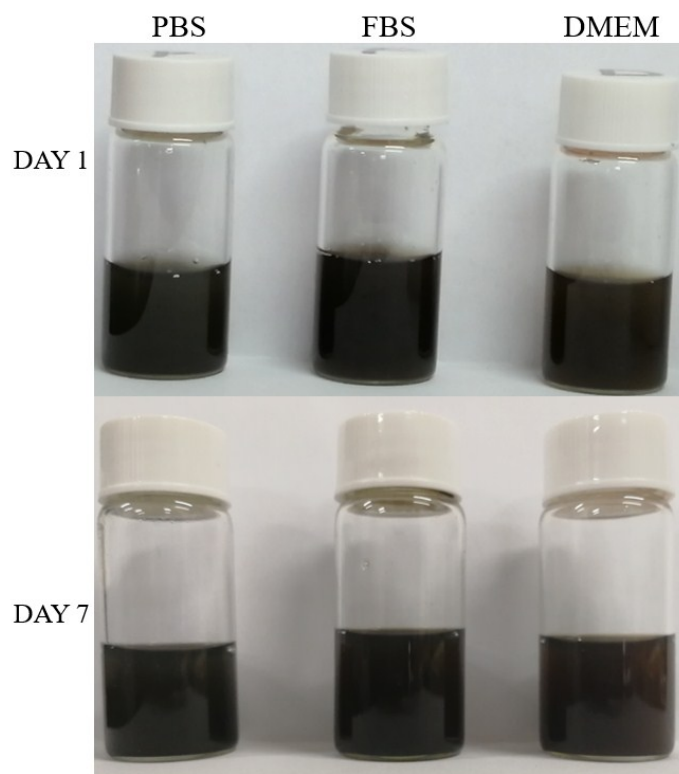

98  
99  
100  
101

**Fig. S4** Photos of  $\text{Bi}_2\text{WO}_{6-x}\text{-CA}_{1.0}$  in PBS, FBS and DMEM dispersions for 1 and 7 day.

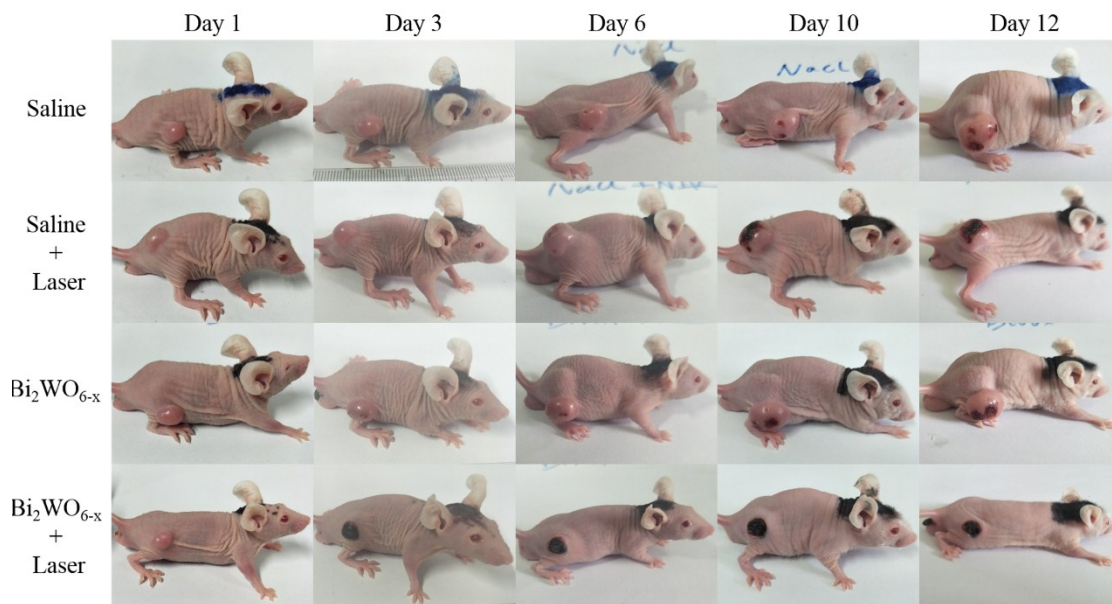

**Fig.S5** Tumor photos after different treatment in four groups.

102  
103  
104  
105  
106  
107  
108

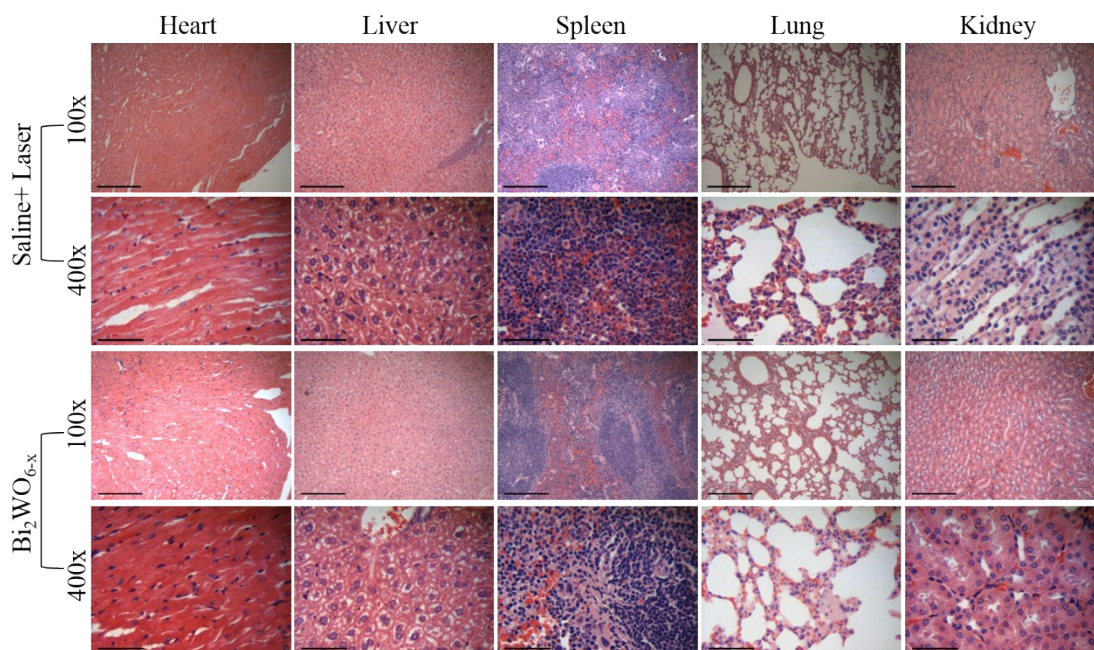

109

**Fig.S6** Histological photographs of the major organ sections for saline injection + Laser group and Bi<sub>2</sub>WO<sub>6-x</sub> injection group, after H&E staining treatment for 24h under a microscope at 100x and 400xmagnification. The scale bars are 200 μm and 50μm, respectively.
